# Supplementary material for: Exploring the Use and Effects of Deliberate Self-Harm Websites: An Internet-Based Study
Source: J Med Internet Res. 2013 Dec 20;15(12):e285. doi: 10.2196/jmir.2802 (PMC3875893; doi:10.2196/jmir.2802)

### Appendix 3 – Analysis maps

For the analysis maps shown below, the topic addressed is represented in grey boxes, the themes in black boxes and the coding categories in white boxes.

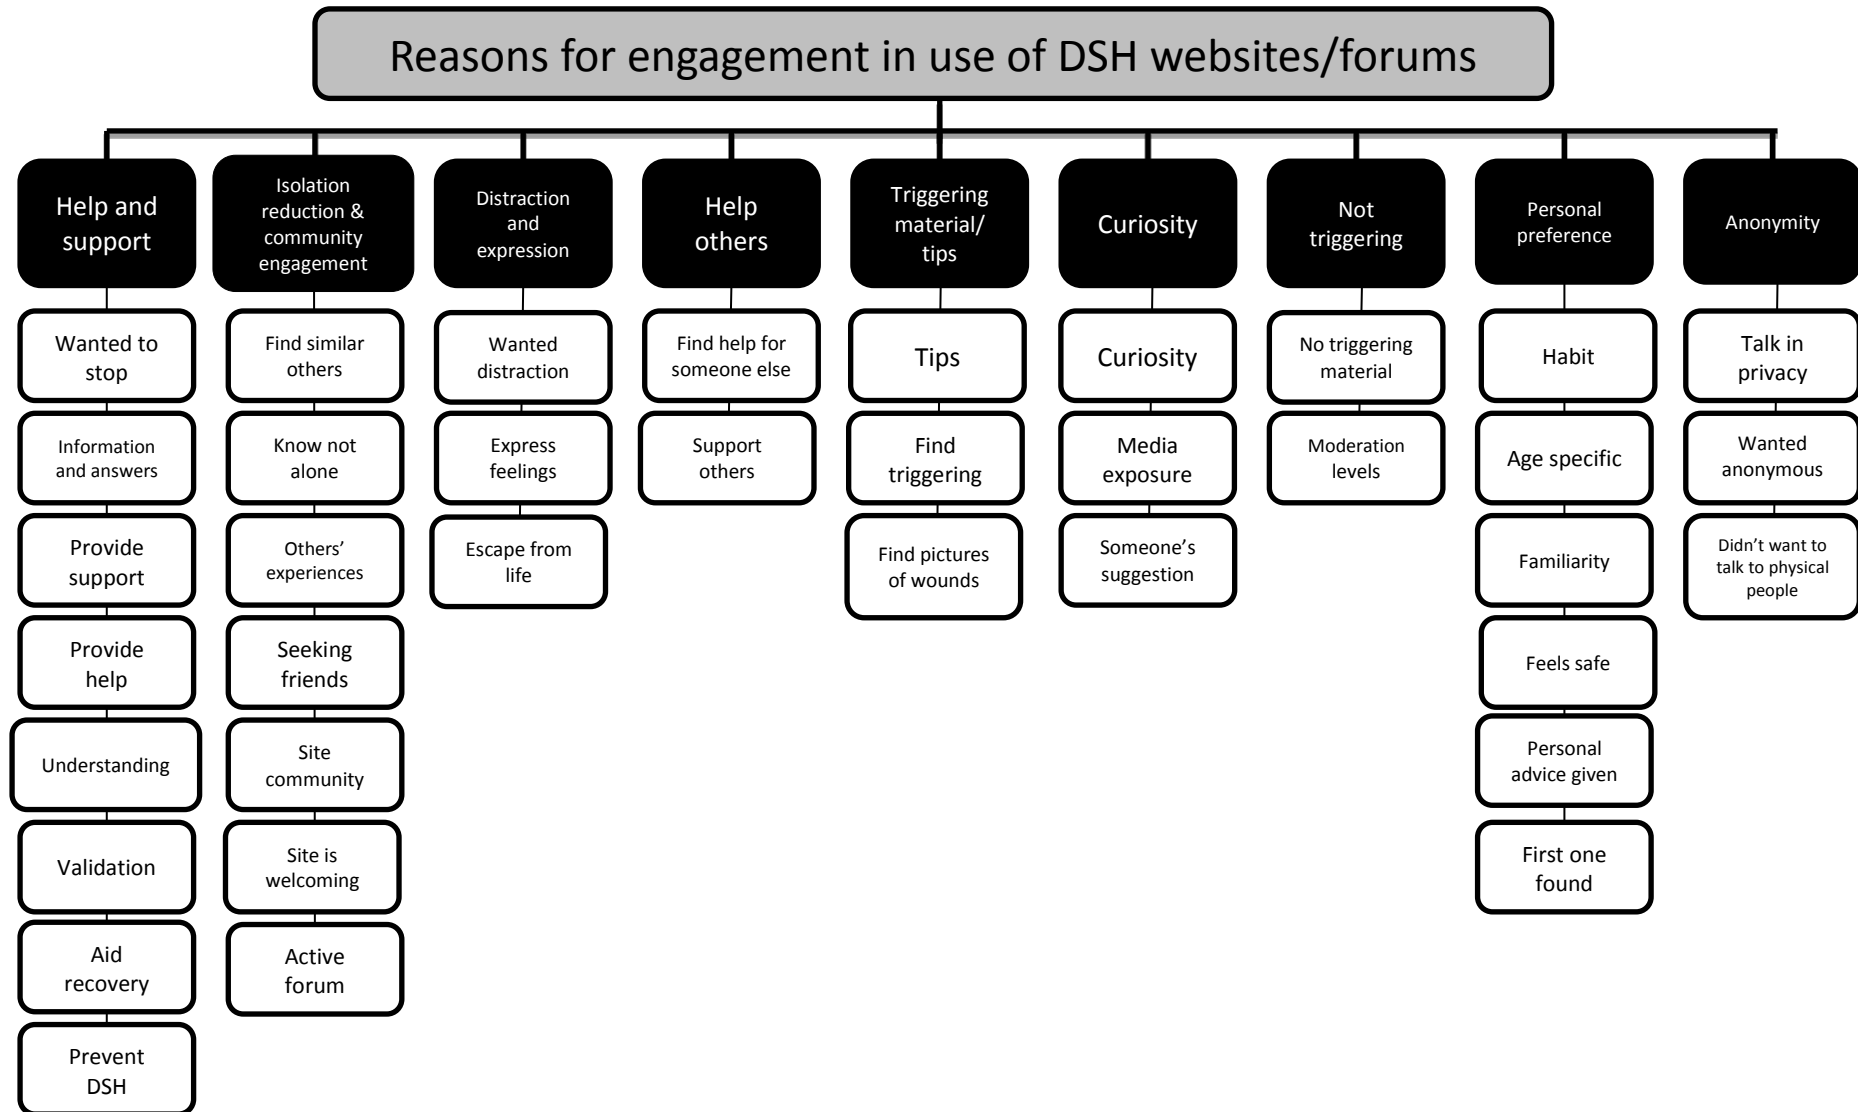

# Effects of engaging in DSH website/forum use

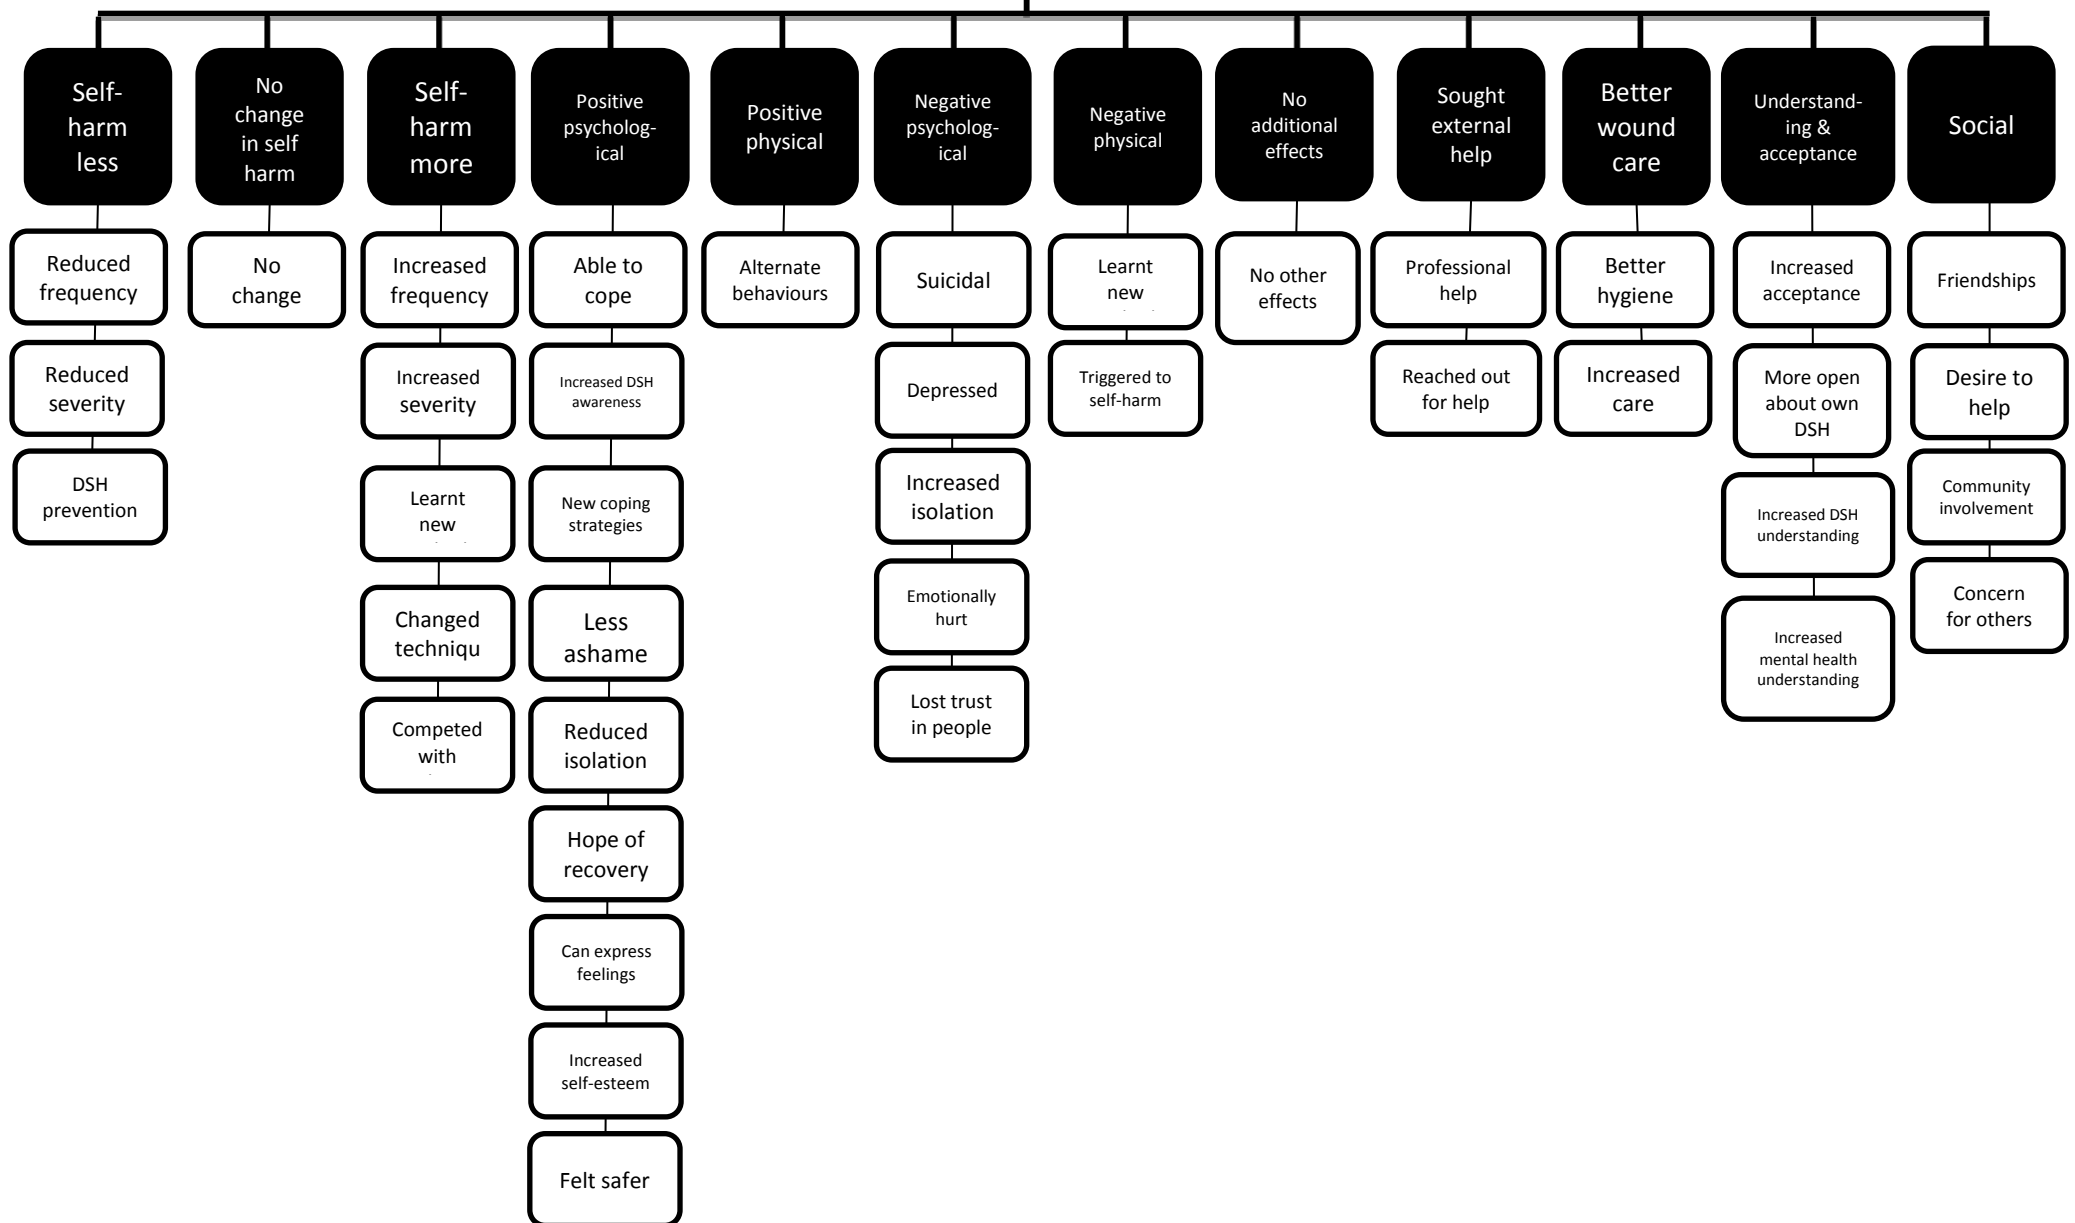

## Beliefs regarding the roles of DSH websites/forums

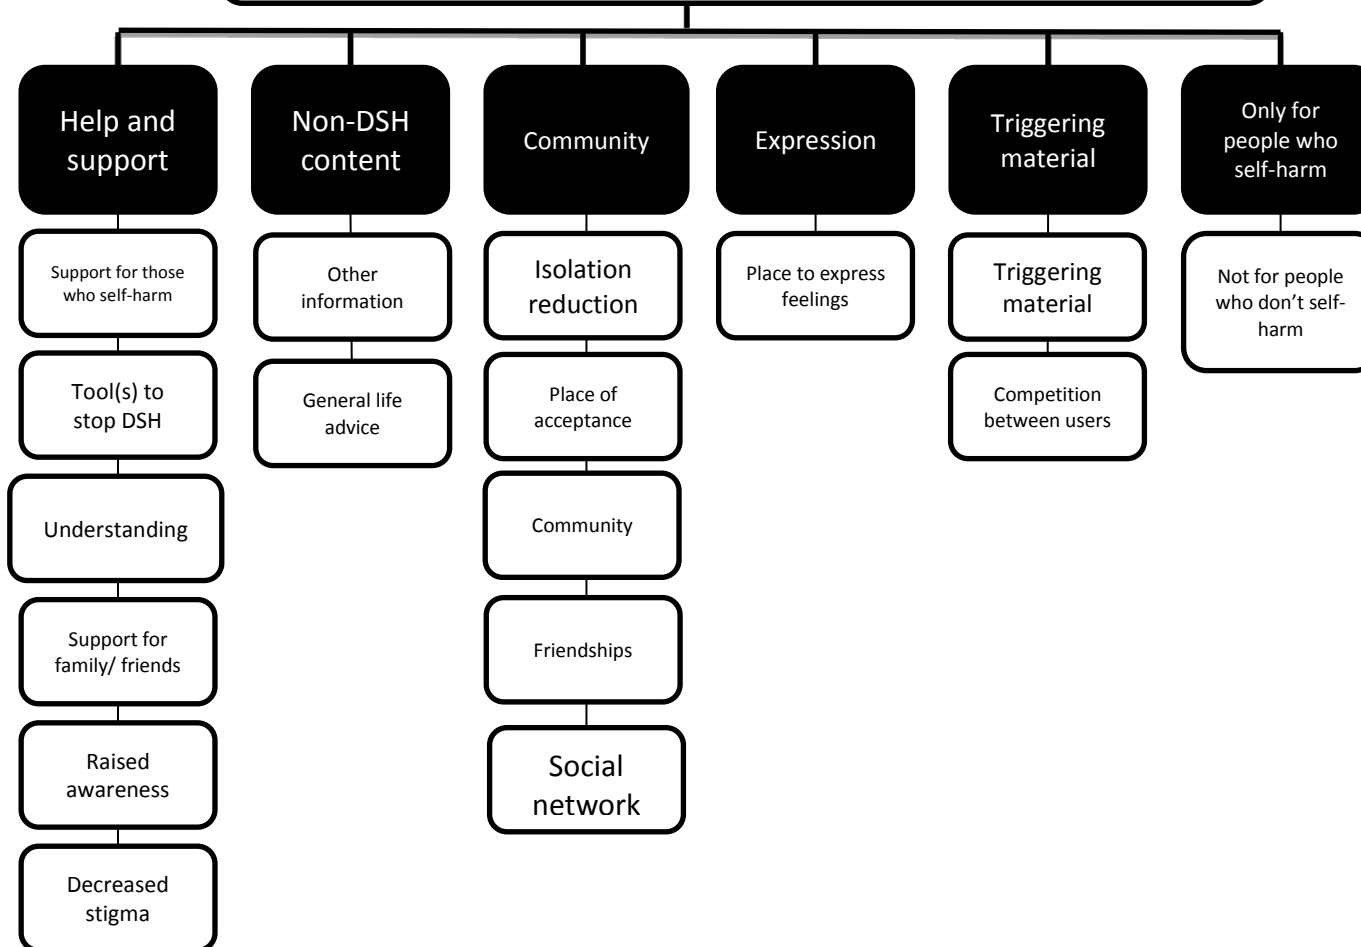

Supplement: Supplementary file 3 [file jmir_v15i12e285_app3.pdf]
